# Supplementary material
Source: publisher site journal article supplement (https://www.spandidos-publications.com/7742/downloadSupplementary)

Figure S1. Flow chart of literature screening.

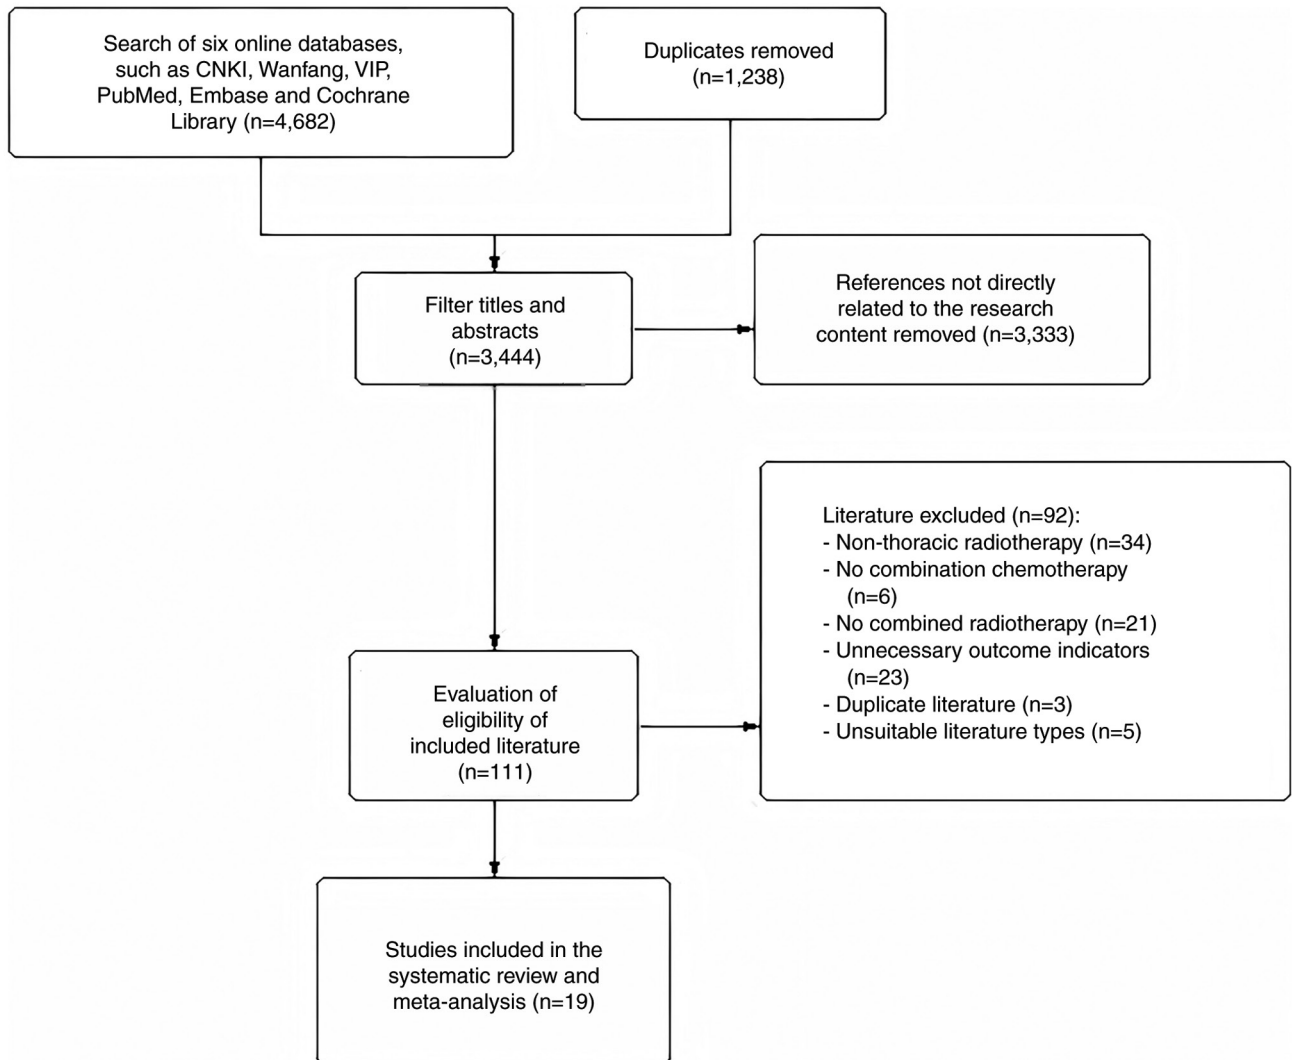

Supplement: Supplementary file 1 [file downloadSupplementary]
